# Supplementary material
Source: ML conference proceedings conference paper supplement (https://openaccess.thecvf.com/content/CVPR2025/html/Yan_UCOD-DPL_Unsupervised_Camouflaged_CVPR_2025_paper.html)
Supplement: Supplementary file 1 [file Yan_UCOD-DPL_Unsupervised_Camouflaged_CVPR_2025_supplemental.pdf]

# UCOD-DPL: Unsupervised Camouflaged Object Detection via Dynamic Pseudo-label Learning

## Supplementary Material

### 6. Loss Definition

In Sec. 3.2, we employ the binary cross-entropy loss  $\mathcal{L}_{\text{BCE}}$  in Eq. (4) and Eq. (9). We assume  $\hat{y}_i$  denotes the model’s prediction for the  $i$ -th labeled data and  $y_i$  denotes its label (*i.e.* ground-truth or pseudo-label). The binary cross-entropy loss can be defined as below:

$$\mathcal{L}_{\text{BCE}}(\hat{y}, y) = -\frac{1}{N} \sum_{i=1}^N [y_i \log(\hat{y}_i) + (1 - y_i) \log(1 - \hat{y}_i)] \quad (15)$$

### 7. Experiment Details

**More Visualization Results.** As shown in Fig. 7, we further present additional challenging samples from the CHALEMEON, CAMO, COD10K, and NC4K datasets, corresponding to scenarios involving small objects, large objects, multiple instances, and highly camouflaged samples. From the comparative results, it can be observed that our method demonstrates superior prediction quality in scenarios involving small objects and multiple objects. However, partial segmentation blur still occurs in some samples with complex textures and high background similarity.

**Full Quantitative Analysis.** As shown in Tab. 5 and Tab. 6, we present the evaluation results of our method across all metrics on the four datasets. We employ the Accuracy( $Acc$ ), mean Intersection over Union( $mIoU$ ), S-measure ( $\mathcal{S}_m$ ) [8], mean and weighted F-measure ( $\mathcal{F}_\beta^m, \mathcal{F}_\beta^w$ ) [31], mean and max E-measure ( $\mathcal{E}_\epsilon^m, \mathcal{E}_\epsilon^x$ ) [9], mean absolute error ( $\mathcal{M}$ ) [39] as the evaluation metrics.

**Implementation Details.** All experiments are implemented with PyTorch 2.1, Accelerate 1.0.1, and run on a machine with Intel(R) Xeon(R) Silver 4214R CPU @ 2.40GHz, 512GiB RAM, and 2 NVIDIA Titan A100-40G GPUs. All experiments use the same random seed.

We build the network by using DINOv1 and DINOv2 as the backbone to extract image features, which are then processed by subsequent modules. All backbone parameters remain frozen during the training process. We set the learning rate to  $2e-4$  and the batch size to 32, using the AdamW as the optimizer and StepLR(step=25) as the learning rate decay strategy. We train the model for 25 epochs, with the last 5 epochs using only the teacher model’s predictions to fine-tune the student model via supervised learning. All inputs are reshaped to  $518 \times 518$ , while the features extracted by the backbone are reshaped to  $68 \times 68$  during the training and testing process.

**Full Ablation Study on Foreground-sizes.** We divided the test set by the proportion of test set prospects at 2% intervals, then benchmarked the performance between our method and some previous SOTA methods[44, 63]. The full results are shown at Fig. 8. We also employ the Accuracy( $Acc$ ), mean Intersection over Union( $mIoU$ ), S-measure ( $\mathcal{S}_m$ ) [8], mean and weighted F-measure ( $\mathcal{F}_\beta^m, \mathcal{F}_\beta^w$ ) [31], mean and max E-measure ( $\mathcal{E}_\epsilon^m, \mathcal{E}_\epsilon^x$ ) [9], mean absolute error ( $\mathcal{M}$ ) [39] as the evaluation metrics.

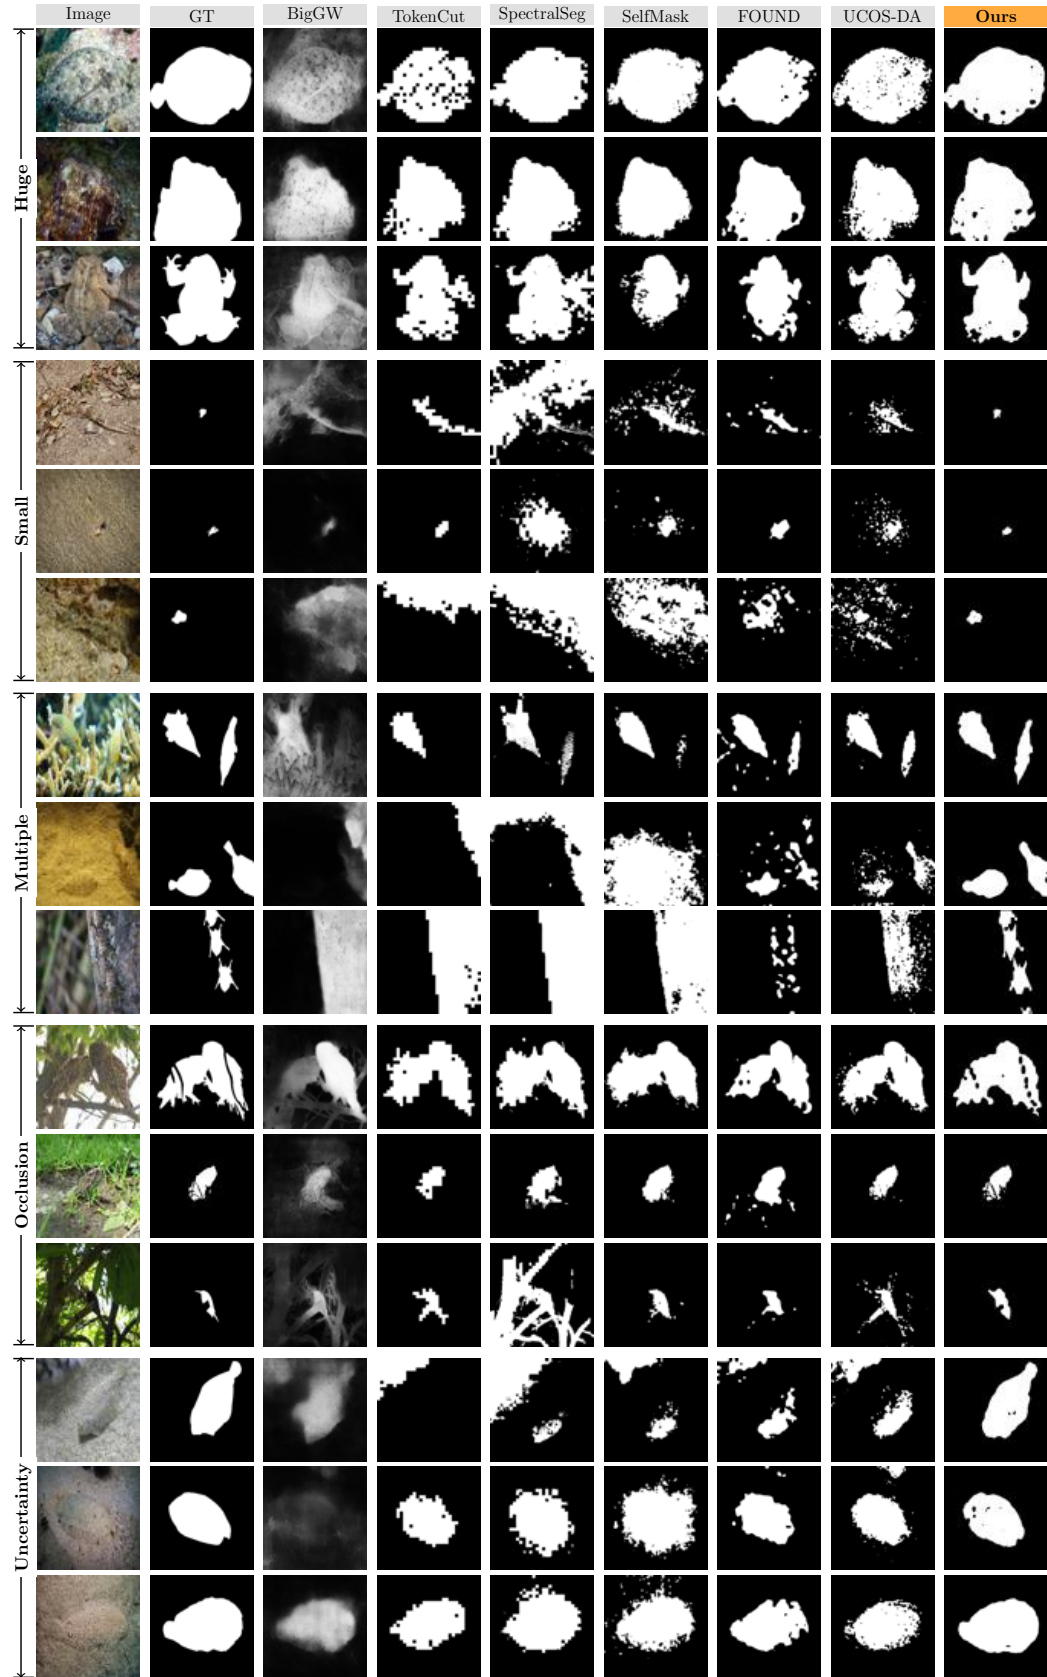

Figure 7. Full visual comparison of our method with other existing methods in challenging scenarios.

| Methods                                | CHAMELEON (87) |                 |                |                                     |                                |                               |                               |                          | CAMO-Test (250) |                 |                |                                     |                                |                               |                               |                          |
|----------------------------------------|----------------|-----------------|----------------|-------------------------------------|--------------------------------|-------------------------------|-------------------------------|--------------------------|-----------------|-----------------|----------------|-------------------------------------|--------------------------------|-------------------------------|-------------------------------|--------------------------|
|                                        | $Acc \uparrow$ | $mIOU \uparrow$ | $S_m \uparrow$ | $\mathcal{F}_\beta^\omega \uparrow$ | $\mathcal{F}_\beta^m \uparrow$ | $\mathcal{E}_\phi^m \uparrow$ | $\mathcal{E}_\phi^x \uparrow$ | $\mathcal{M} \downarrow$ | $Acc \uparrow$  | $mIOU \uparrow$ | $S_m \uparrow$ | $\mathcal{F}_\beta^\omega \uparrow$ | $\mathcal{F}_\beta^m \uparrow$ | $\mathcal{E}_\phi^m \uparrow$ | $\mathcal{E}_\phi^x \uparrow$ | $\mathcal{M} \downarrow$ |
| <i>Fully-Supervised Methods</i>        |                |                 |                |                                     |                                |                               |                               |                          |                 |                 |                |                                     |                                |                               |                               |                          |
| SINet <sub>20</sub> [10]               | -              | -               | .872           | .806                                | .827                           | .946                          | -                             | .034                     | -               | -               | .751           | .606                                | .675                           | .771                          | -                             | .100                     |
| C <sup>2</sup> FNet <sub>21</sub> [47] | -              | -               | .888           | .828                                | .844                           | .946                          | -                             | .032                     | -               | -               | .796           | .719                                | .762                           | .864                          | -                             | .080                     |
| MGL-R <sub>21</sub> [61]               | -              | -               | .893           | .812                                | .834                           | .941                          | -                             | .030                     | -               | -               | .775           | .673                                | .726                           | .842                          | -                             | .088                     |
| UGTR <sub>21</sub> [58]                | -              | -               | .887           | .794                                | .819                           | .940                          | -                             | .031                     | -               | -               | .784           | .684                                | .735                           | .851                          | -                             | .086                     |
| BGNet <sub>22</sub> [48]               | -              | -               | .901           | .851                                | .860                           | .954                          | -                             | .027                     | -               | -               | .812           | .749                                | .789                           | .870                          | -                             | .073                     |
| ZoomNet <sub>22</sub> [37]             | -              | -               | .902           | .845                                | .864                           | .958                          | -                             | .023                     | -               | -               | .820           | .752                                | .794                           | .878                          | -                             | .066                     |
| SINetv <sub>22</sub> [12]              | -              | -               | .888           | .816                                | .835                           | .961                          | -                             | .030                     | -               | -               | .820           | .743                                | .782                           | .882                          | -                             | .070                     |
| HitNet <sub>23</sub> [22]              | -              | -               | <u>.921</u>    | <u>.897</u>                         | <u>.900</u>                    | <b>.972</b>                   | -                             | <u>.019</u>              | -               | -               | .849           | <u>.809</u>                         | <u>.831</u>                    | <u>.906</u>                   | -                             | .055                     |
| FSPNet <sub>23</sub> [23]              | -              | -               | .908           | .851                                | .867                           | .965                          | -                             | .023                     | -               | -               | <u>.856</u>    | .799                                | .830                           | .899                          | <u>.928</u>                   | <u>.050</u>              |
| BiRefNet <sub>24</sub> [64]            | -              | -               | <b>.929</b>    | <b>.911</b>                         | <b>.922</b>                    | <u>.968</u>                   | -                             | <b>.016</b>              | -               | -               | <b>.932</b>    | <b>.914</b>                         | <b>.922</b>                    | <b>.974</b>                   | <b>.959</b>                   | <b>.015</b>              |
| <i>Semi-Supervised Methods</i>         |                |                 |                |                                     |                                |                               |                               |                          |                 |                 |                |                                     |                                |                               |                               |                          |
| CamoTeacher <sub>24</sub> (1%)[27]     | -              | -               | .652           | .472                                | .558                           | .714                          | .762                          | .093                     | -               | -               | .621           | .456                                | .545                           | .669                          | .736                          | .136                     |
| CamoTeacher <sub>24</sub> (5%)[27]     | -              | -               | .729           | .587                                | .656                           | .785                          | .822                          | .070                     | -               | -               | .669           | .523                                | .601                           | .711                          | .775                          | .122                     |
| CamoTeacher <sub>24</sub> (10%)[27]    | -              | -               | .756           | .617                                | .684                           | .813                          | .851                          | .065                     | -               | -               | .701           | .560                                | .742                           | .795                          | .795                          | .112                     |
| SCOD-ND <sub>24</sub> (10%)[13]        | -              | -               | .850           | .773                                | -                              | .928                          | -                             | .036                     | -               | -               | .789           | .732                                | -                              | .859                          | -                             | .077                     |
| <i>Unsupervised Methods</i>            |                |                 |                |                                     |                                |                               |                               |                          |                 |                 |                |                                     |                                |                               |                               |                          |
| BigGW <sub>21</sub> [51]               | .807           | .267            | .547           | .244                                | .294                           | .527                          | .662                          | .257                     | .775            | .322            | .565           | .299                                | .349                           | .528                          | .678                          | .282                     |
| TokenCut <sub>22</sub> [53]            | .868           | .436            | .654           | .496                                | .536                           | .740                          | .743                          | .132                     | .837            | .431            | .633           | .498                                | .543                           | .706                          | .708                          | .163                     |
| TokenCut <sub>22</sub> w/B.S.[53]      | .871           | .415            | .655           | .351                                | .393                           | .582                          | .734                          | .169                     | .838            | .422            | .639           | .383                                | .434                           | .595                          | .699                          | .195                     |
| SpectralSeg <sub>22</sub> [32]         | .780           | .381            | .575           | .410                                | .440                           | .628                          | .638                          | .220                     | .765            | .411            | .579           | .450                                | .481                           | .648                          | .658                          | .235                     |
| SelfMask <sub>22</sub> [43]            | .825           | .396            | .619           | .436                                | .481                           | .675                          | .726                          | .176                     | .813            | .418            | .617           | .483                                | .536                           | .698                          | .713                          | .176                     |
| SelfMask <sub>22</sub> w/U.B.[43]      | .832           | .406            | .629           | .447                                | .491                           | .683                          | .734                          | .169                     | .819            | .430            | .627           | .495                                | .547                           | .708                          | .724                          | .182                     |
| FOUND <sub>23-DINOv1</sub> [44]        | .905           | .468            | .684           | .542                                | .590                           | .810                          | .812                          | .095                     | .871            | .505            | .685           | .584                                | .633                           | .782                          | .784                          | .129                     |
| *FOUND <sub>23-DINOv2</sub> [44]       | .943           | .691            | <u>.829</u>    | <u>.757</u>                         | <u>.781</u>                    | <u>.911</u>                   | <u>.921</u>                   | <u>.040</u>              | <u>.905</u>     | <u>.628</u>     | <u>.770</u>    | <u>.704</u>                         | <u>.740</u>                    | <u>.849</u>                   | <u>.851</u>                   | <u>.090</u>              |
| UCOS-DA <sub>23-DINOv1</sub> [63]      | .905           | .525            | .715           | .591                                | .629                           | .802                          | .804                          | .095                     | .873            | .528            | .701           | .606                                | .646                           | .784                          | .768                          | .127                     |
| *UCOS-DA <sub>23-DINOv2</sub> [63]     | .840           | .455            | .750           | .639                                | .666                           | .808                          | .692                          | .091                     | .812            | .470            | .702           | .604                                | .633                           | .751                          | .692                          | .148                     |
| <b>Ours<sub>DINOv1</sub></b>           | .928           | .529            | .734           | .625                                | .680                           | .854                          | .856                          | .072                     | .892            | .508            | .706           | .621                                | .689                           | .801                          | .803                          | .108                     |
| <b>Ours<sub>DINOv2</sub></b>           | <b>.969</b>    | <b>.753</b>     | <b>.864</b>    | <b>.825</b>                         | <b>.838</b>                    | <b>.931</b>                   | <b>.933</b>                   | <b>.031</b>              | <b>.923</b>     | <b>.652</b>     | <b>.793</b>    | <b>.747</b>                         | <b>.779</b>                    | <b>.862</b>                   | <b>.865</b>                   | <b>.077</b>              |

Table 5. **Full comparison of our methods with recent methods on CHAMELEON and CAMO test datasets.** We compared our proposed methods with competing unsupervised, semi-supervised, and full-supervised methods. **Bold** indicates the best result in group settings, and underline indicates the second-best result. \* denotes the version that reimplemented by us.

| Methods                                | COD10K-Test (2,026) |                 |                |                                     |                                |                               |                               |                          | NC4K (4,121)   |                 |                |                                     |                                |                               |                               |                          |
|----------------------------------------|---------------------|-----------------|----------------|-------------------------------------|--------------------------------|-------------------------------|-------------------------------|--------------------------|----------------|-----------------|----------------|-------------------------------------|--------------------------------|-------------------------------|-------------------------------|--------------------------|
|                                        | $Acc \uparrow$      | $mIOU \uparrow$ | $S_m \uparrow$ | $\mathcal{F}_\beta^\omega \uparrow$ | $\mathcal{F}_\beta^m \uparrow$ | $\mathcal{E}_\phi^m \uparrow$ | $\mathcal{E}_\phi^x \uparrow$ | $\mathcal{M} \downarrow$ | $Acc \uparrow$ | $mIOU \uparrow$ | $S_m \uparrow$ | $\mathcal{F}_\beta^\omega \uparrow$ | $\mathcal{F}_\beta^m \uparrow$ | $\mathcal{E}_\phi^m \uparrow$ | $\mathcal{E}_\phi^x \uparrow$ | $\mathcal{M} \downarrow$ |
| <i>Fully-Supervised Methods</i>        |                     |                 |                |                                     |                                |                               |                               |                          |                |                 |                |                                     |                                |                               |                               |                          |
| SINet <sub>20</sub> [10]               | -                   | -               | .771           | .551                                | .634                           | .806                          | -                             | .051                     | -              | -               | .808           | .723                                | .769                           | .871                          | -                             | .058                     |
| C <sup>2</sup> FNet <sub>21</sub> [47] | -                   | -               | .813           | .686                                | .723                           | .900                          | -                             | .036                     | -              | -               | .838           | .762                                | .794                           | .904                          | -                             | .049                     |
| MGL-R <sub>21</sub> [61]               | -                   | -               | .814           | .666                                | .710                           | .890                          | -                             | .035                     | -              | -               | .833           | .739                                | .782                           | .893                          | -                             | .053                     |
| UGTR <sub>21</sub> [58]                | -                   | -               | .817           | .666                                | .711                           | .890                          | -                             | .036                     | -              | -               | .839           | .746                                | .787                           | .899                          | -                             | .052                     |
| BGNet <sub>22</sub> [48]               | -                   | -               | .831           | .722                                | .753                           | .901                          | -                             | .033                     | -              | -               | .851           | .788                                | .820                           | .907                          | -                             | .044                     |
| ZoomNet <sub>22</sub> [37]             | -                   | -               | .838           | .729                                | .766                           | .888                          | -                             | .029                     | -              | -               | .853           | .784                                | .818                           | .896                          | -                             | .043                     |
| SINetv <sub>22</sub> [12]              | -                   | -               | .815           | .680                                | .718                           | .887                          | -                             | .037                     | -              | -               | .847           | .770                                | .805                           | .903                          | -                             | .048                     |
| HitNet <sub>23</sub> [22]              | -                   | -               | <u>.871</u>    | <u>.806</u>                         | <u>.823</u>                    | <u>.935</u>                   | -                             | <u>.023</u>              | -              | -               | <u>.875</u>    | <u>.834</u>                         | <u>.853</u>                    | <u>.926</u>                   | -                             | .037                     |
| FSPNet <sub>23</sub> [23]              | -                   | -               | .851           | .735                                | .769                           | .895                          | <u>.930</u>                   | .026                     | -              | -               | <u>.879</u>    | .816                                | .843                           | .915                          | <u>.937</u>                   | <u>.035</u>              |
| BiRefNet <sub>24</sub> [64]            | -                   | -               | <b>.913</b>    | <b>.874</b>                         | <b>.888</b>                    | <b>.960</b>                   | <b>.967</b>                   | <b>.014</b>              | -              | -               | <b>.914</b>    | <b>.894</b>                         | <b>.909</b>                    | <b>.953</b>                   | <b>.960</b>                   | <b>.023</b>              |
| <i>Semi-Supervised Methods</i>         |                     |                 |                |                                     |                                |                               |                               |                          |                |                 |                |                                     |                                |                               |                               |                          |
| CamoTeacher <sub>24</sub> (1%)[27]     | -                   | -               | .699           | .517                                | .582                           | .788                          | .797                          | .062                     | -              | -               | .718           | .599                                | .675                           | .779                          | .814                          | .090                     |
| CamoTeacher <sub>24</sub> (5%)[27]     | -                   | -               | .745           | .583                                | .644                           | .827                          | .840                          | .050                     | -              | -               | .777           | .677                                | .739                           | .834                          | .859                          | .071                     |
| CamoTeacher <sub>24</sub> (10%)[27]    | -                   | -               | .759           | .594                                | .652                           | .836                          | .854                          | .049                     | -              | -               | .791           | .687                                | .746                           | .842                          | .868                          | .068                     |
| SCOD-ND <sub>24</sub> (10%)[13]        | -                   | -               | .819           | .725                                | -                              | .891                          | -                             | .033                     | -              | -               | .838           | .787                                | -                              | .903                          | -                             | .046                     |
| <i>Unsupervised Methods</i>            |                     |                 |                |                                     |                                |                               |                               |                          |                |                 |                |                                     |                                |                               |                               |                          |
| BigGW <sub>21</sub> [51]               | .798                | .236            | .528           | .185                                | .246                           | .497                          | .670                          | .261                     | .814           | .382            | .608           | .319                                | .391                           | .565                          | .714                          | .246                     |
| TokenCut <sub>22</sub> [53]            | .897                | .415            | .658           | .469                                | .502                           | .735                          | .740                          | .103                     | .899           | .546            | .725           | .615                                | .649                           | .802                          | .806                          | .101                     |
| TokenCut <sub>22</sub> w/B.S.[53]      | .903                | .423            | .666           | .334                                | .399                           | .609                          | .739                          | .127                     | .904           | .561            | .735           | .478                                | .547                           | .683                          | .807                          | .133                     |
| SpectralSeg <sub>22</sub> [32]         | .807                | .331            | .575           | .360                                | .388                           | .595                          | .606                          | .193                     | .841           | .495            | .669           | .535                                | .562                           | .719                          | .729                          | .159                     |
| SelfMask <sub>22</sub> [43]            | .870                | .388            | .637           | .431                                | .469                           | .679                          | .718                          | .131                     | .887           | .529            | .716           | .593                                | .634                           | .777                          | .796                          | .114                     |
| SelfMask <sub>22</sub> w/U.B.[43]      | .875                | .397            | .645           | .440                                | .478                           | .687                          | .728                          | .125                     | .891           | .538            | .723           | .601                                | .642                           | .784                          | .803                          | .110                     |
| FOUND <sub>23-DINOv1</sub> [44]        | .915                | .428            | .670           | .482                                | .520                           | .751                          | .753                          | .085                     | .916           | .566            | .741           | .637                                | .674                           | .824                          | .827                          | .084                     |
| *FOUND <sub>23-DINOv2</sub> [44]       | <u>.946</u>         | <u>.574</u>     | <u>.767</u>    | <u>.641</u>                         | <u>.668</u>                    | <u>.847</u>                   | <u>.850</u>                   | <u>.045</u>              | <u>.939</u>    | <u>.679</u>     | <u>.816</u>    | <u>.756</u>                         | <u>.783</u>                    | <u>.893</u>                   | <u>.896</u>                   | <u>.052</u>              |
| UCOS-DA <sub>23-DINOv1</sub> [63]      | .914                | .462            | .689           | .513                                | .546                           | .740                          | .741                          | .086                     | .915           | .590            | .755           | .656                                | .689                           | .819                          | .822                          | .085                     |
| *UCOS-DA <sub>23-DINOv2</sub> [63]     | .882                | .430            | .655           | .467                                | .495                           | .687                          | .689                          | .120                     | .897           | .570            | .731           | .617                                | .644                           | .785                          | .787                          | .103                     |
| <b>Ours<sub>DINOv1</sub></b>           | .941                | .492            | .727           | .577                                | .627                           | .822                          | .824                          | .059                     | .926           | .573            | .761           | .680                                | .737                           | .851                          | .853                          | .074                     |
| <b>Ours<sub>DINOv2</sub></b>           | <b>.969</b>         | <b>.680</b>     | <b>.834</b>    | <b>.763</b>                         | <b>.779</b>                    | <b>.916</b>                   | <b>.918</b>                   | <b>.031</b>              | <b>.958</b>    | <b>.734</b>     | <b>.850</b>    | <b>.818</b>                         | <b>.835</b>                    | <b>.923</b>                   | <b>.925</b>                   | <b>.043</b>              |

Table 6. **Full comparison of our methods with recent methods on COD10K and NC4K test datasets.** We compared our proposed methods with competing unsupervised, semi-supervised, and full-supervised methods. **Bold** indicates the best result in group settings, and underline indicates the second-best result. \* denotes the version that reimplemented by us.

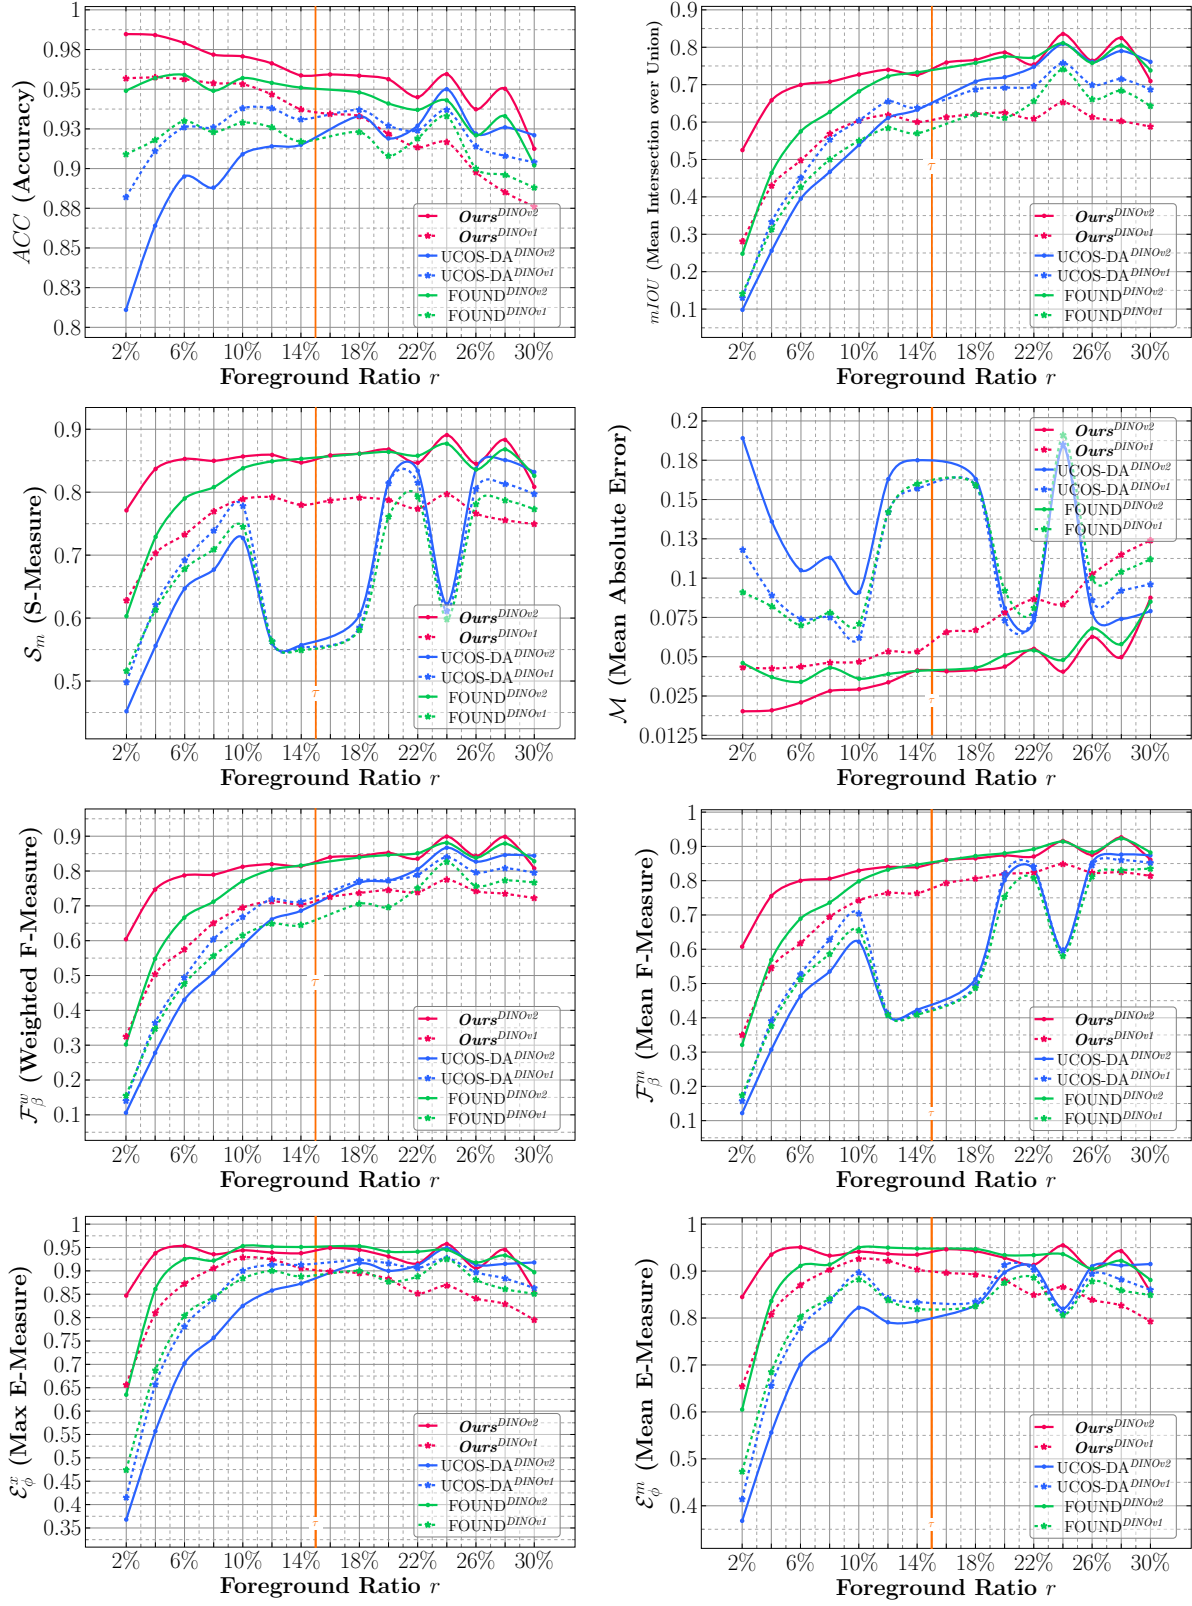

Figure 8. Performance comparison for different foreground sizes on COD10K-Test dataset.
